# Supplementary material for: Evaluating the appropriateness of chemotherapy in a low‐resource cancer centre in sub‐Saharan Africa
Source: PubMed Central journal article supplement (PMC6943087; doi:10.1002/cam4.2672), 2019-11-13
Supplement: CAM4-9-133-s001.pdf [file CAM4-9-133-s001.pdf]

# TREATMENT

Name: \_\_\_\_\_ Surname: \_\_\_\_\_ Date of Birth \_\_\_\_\_

Weight Kg: \_\_\_\_\_ Height cm: \_\_\_\_\_ PS \_\_\_\_\_ BSA \_\_\_\_\_

Site of disease \_\_\_\_\_

Subject N. : \_ \_ \_

Age: \_ \_

Sex:  1. M  2. F

Cycle N. \_ \_

Treatment:

Schedule:

Date of last administration \_ / \_ / \_ \_ \_ \_

Date of current administration \_ / \_ / \_ \_ \_ \_

| DRUG | Treatment Omitted* | Treatment Delayed* | Dose Reduction* | Total dose Administered | Dose Administered |
|------|--------------------|--------------------|-----------------|-------------------------|-------------------|
| 1.   |                    |                    |                 | mg                      | mg/m <sup>2</sup> |
| 2.   |                    |                    |                 | mg                      | mg/m <sup>2</sup> |
| 3.   |                    |                    |                 | mg                      | mg/m <sup>2</sup> |
| 4.   |                    |                    |                 | mg                      | mg/m <sup>2</sup> |

\*0 = NO

1 = Yes, hematological toxicity

2 = Yes, NON hematological toxicity

3 = Yes, Both

4 = Related to patient

5 = Related to center

6 = Other, specify \_\_\_\_\_

# TOXICITY

| Adverse Event                                     |  | 0    | GRADE                                                                                                             |                                                                                                                                |                                                                                                                                                                      |                                                              |       |
|---------------------------------------------------|--|------|-------------------------------------------------------------------------------------------------------------------|--------------------------------------------------------------------------------------------------------------------------------|----------------------------------------------------------------------------------------------------------------------------------------------------------------------|--------------------------------------------------------------|-------|
|                                                   |  |      | 1                                                                                                                 | 2                                                                                                                              | 3                                                                                                                                                                    | 4                                                            | 5     |
| <b>Anemia</b>                                     |  | None | Hemoglobin (Hgb) <LLN - 10.0 g/dL; <LLN - 6.2 mmol/L; <LLN - 100 g/L                                              | Hgb <10.0 - 8.0 g/dL; <6.2 - 4.9 mmol/L; <100 - 80g/L                                                                          | Hgb <8.0 - 6.5 g/dL; <4.9 - 4.0 mmol/L; <80 - 65 g/L; transfusion indicated                                                                                          | Life-threatening consequences; urgent intervention indicated | Death |
| <b>Neutropenia</b>                                |  |      | <LLN - 1500/mm <sup>3</sup> ; <LLN - 1.5 x 10 <sup>9</sup> /L                                                     | <1500 - 1000/mm <sup>3</sup> ; <1.5 - 1.0 x 10 <sup>9</sup> /L                                                                 | <1000 - 500/mm <sup>3</sup> ; <1.0 - 0.5 x 10 <sup>9</sup> /L                                                                                                        | 0/mm <sup>3</sup> ; <0.5 x 10 <sup>9</sup> /L                |       |
| <b>Febrile neutropenia</b>                        |  | None | -                                                                                                                 | -                                                                                                                              | Present                                                                                                                                                              | Life-threatening consequences; urgent intervention indicated | Death |
| <b>Hyperuricemia</b>                              |  | None | >ULN - 10 mg/dL; <=0.59 mmol/L without physiologic consequences                                                   | -                                                                                                                              | >ULN - 10 mg/dL; <=0.59 mmol/L with physiologic consequences                                                                                                         | >10 mg/dL; >0.59 mmol/L; life-threatening consequences       | Death |
| <b>Nausea</b>                                     |  | None | Loss of appetite without alteration in eating habits                                                              | Oral intake decreased without significant weight loss, dehydration or malnutrition                                             | Inadequate oral caloric or fluid intake; tube feeding, TPN, or hospitalization indicated                                                                             | -                                                            | -     |
| <b>Vomiting</b>                                   |  | None | 1 - 2 episodes (separated by 5 minutes) in 24 hrs                                                                 | 3 - 5 episodes (separated by 5 minutes) in 24 hrs                                                                              | >=6 episodes (separated by 5 minutes) in 24 hrs; tube feeding, TPN or hospitalization indicated                                                                      | Life-threatening consequences; urgent intervention indicated | Death |
| <b>Mucositis/Stomatitis</b>                       |  | None | Asymptomatic or mild symptoms; intervention not indicated                                                         | Moderate pain; not interfering with oral intake; modified diet indicated                                                       | Severe pain; interfering with oral intake                                                                                                                            | Life-threatening consequences; urgent intervention indicated | Death |
| <b>Diarrhea</b>                                   |  | None | Increase of <4 stools per day over baseline; mild increase in ostomy output compared to baseline                  | Increase of 4 - 6 stools per day over baseline; moderate increase in ostomy output compared to baseline                        | Increase of >=7 stools per day over baseline; incontinence; hospitalization indicated; severe increase in ostomy output compared to baseline; limiting self care ADL | Life-threatening consequences; urgent intervention indicated | Death |
| <b>Constipation</b>                               |  | None | Occasional or intermittent symptoms; occasional use of stool softeners, laxatives, dietary modification, or enema | Persistent symptoms with regular use of laxatives or enemas; limiting instrumental ADL                                         | Obstipation with manual evacuation indicated; limiting self care ADL                                                                                                 | Life-threatening consequences; urgent intervention indicated | Death |
| <b>Fever (NOT reciving chemot)</b>                |  | None | 38.0 - 39.0 degrees C (100.4 - 102.2 degrees F)                                                                   | >39.0 - 40.0 degrees C (102.3 - 104.0 degrees F)                                                                               | >40.0 degrees C (>104.0 degrees F) for <=24 hrs                                                                                                                      | >40.0 degrees C (>104.0 degrees F) for >24 hrs               | Death |
| <b>Palmar-plantar erythrodysesthesia syndrome</b> |  | None | Minimal skin changes or dermatitis (e.g., erythema, edema, or hyperkeratosis) without pain                        | Skin changes (e.g., peeling, blisters, bleeding, edema, or hyperkeratosis) with pain; limiting instrumental ADL                | Severe skin changes (e.g., peeling, blisters, bleeding, edema, or hyperkeratosis) with pain; limiting self care ADL                                                  | -                                                            | Death |
| <b>Fatigue</b>                                    |  | None | Fatigue relieved by rest                                                                                          | Fatigue not relieved by rest; limiting instrumental ADL                                                                        | Fatigue not relieved by rest, limiting self care ADL                                                                                                                 | -                                                            | Death |
| <b>Anorexia</b>                                   |  | None | Loss of appetite without alteration in eating habits                                                              | Oral intake altered without significant weight loss or malnutrition; oral nutritional supplements indicated                    | Associated with significant weight loss or malnutrition (e.g., inadequate oral caloric and/or fluid intake); tube feeding or TPN indicated                           | Life-threatening consequences; urgent intervention indicated | Death |
| <b>Dyspnea</b>                                    |  | None | Shortness of breath with moderate exertion                                                                        | Shortness of breath with minimal exertion; limiting instrumental ADL                                                           | Shortness of breath at rest; limiting self care ADL                                                                                                                  | Life-threatening consequences; urgent intervention indicated | Death |
| <b>Rash maculo-papular</b>                        |  | None | Macules/papules covering <10% BSA with or without symptoms (e.g., pruritus, burning, tightness)                   | Macules/papules covering 10 - 30% BSA with or without symptoms (e.g., pruritus, burning, tightness); limiting instrumental ADL | Macules/papules covering >30% BSA with or without associated symptoms; limiting self care ADL                                                                        | -                                                            | Death |
| <b>Peripheral sensory neuropathy</b>              |  | None | Asymptomatic; loss of deep tendon reflexes or paresthesia                                                         | Moderate symptoms; limiting instrumental ADL                                                                                   | Severe symptoms; limiting self care ADL                                                                                                                              | Life-threatening consequences; urgent intervention indicated | Death |
| <b>Tumor pain</b>                                 |  | None | Mild pain                                                                                                         | Moderate pain; limiting instrumental ADL                                                                                       | Severe pain; limiting self care ADL                                                                                                                                  | - H20                                                        | -     |
